# Supplementary material
Source: PubMed Central journal article supplement (PMC3966754)
Supplement: bph0171-1758-sd4.pdf [file bph0171-1758-sd4.pdf]

|                                                        | <u>analysis</u>   | <u>significance</u>           | <u>factor</u>          |                                                     | <u>analysis</u>   | <u>significance</u>           | <u>factor</u>               |
|--------------------------------------------------------|-------------------|-------------------------------|------------------------|-----------------------------------------------------|-------------------|-------------------------------|-----------------------------|
| <b>Plasma concentrations</b>                           |                   |                               |                        | <b>Home cage activity</b>                           |                   |                               |                             |
| (nicotine [ $\mu\text{g}\cdot\text{l}^{-1}$ ])         | multivariate      | $F_{(3,12)}=0.71, p=0.415$    | sex·genotype           | (time active [%])                                   | repeated measures | $F_{(3,39)}=0.63, p=0.641^*$  | treatment·time·sex·genotype |
|                                                        | multivariate      | $F_{(1,12)}=1.69, p=0.621$    | genotype               |                                                     | repeated measures | $F_{(3,39)}=0.55, p=0.801^*$  | time·treatment              |
|                                                        | multivariate      | $F_{(1,12)}=0.74, p=0.406$    | sex                    |                                                     | repeated measures | $F_{(3,39)}=0.58, p=0.676^*$  | time·genotype               |
| (cotinine [ $\mu\text{g}\cdot\text{l}^{-1}$ ])         | multivariate      | $F_{(3,12)}=0.49, p=0.499$    | sex·genotype           |                                                     | repeated measures | $F_{(3,39)}=0.60, p=0.660^*$  | time·sex                    |
|                                                        | multivariate      | $F_{(1,12)}=0.26, p=0.218$    | genotype               |                                                     | repeated measures | $F_{(3,39)}=3.65, p=0.013^*$  | time                        |
|                                                        | multivariate      | $F_{(1,12)}=0.30, p=0.593$    | sex                    |                                                     |                   |                               |                             |
| <b>Caloric intake</b>                                  |                   |                               |                        | <b>Working memory</b>                               |                   |                               |                             |
| <u>7-13 days food restriction</u>                      |                   |                               |                        | <u>forced alternation training</u>                  |                   |                               |                             |
| (food consumption [ $\text{g}\cdot\text{d}^{-1}$ ])    | univariate        | $F_{(7,9)}=0.17, p=0.686$     | treatment·sex·genotype | (time reward collected [s])                         | repeated measures | $F_{(3,169)}=0.94, p=0.474^*$ | treatment·time·sex·genotype |
|                                                        | univariate        | $F_{(1,9)}=0.16, p=0.310$     | treatment              |                                                     | repeated measures | $F_{(3,169)}=0.74, p=0.551^*$ | time·genotype·sex           |
|                                                        | univariate        | $F_{(1,9)}=0.25, p=0.631$     | genotype               |                                                     | repeated measures | $F_{(3,169)}=0.65, p=0.716^*$ | time·treatment·sex          |
|                                                        | univariate        | $F_{(1,9)}=0.22, p=0.651$     | sex                    |                                                     | repeated measures | $F_{(3,169)}=0.70, p=0.670^*$ | time·treatment              |
| <u>free access to food</u>                             |                   |                               |                        | <u>paired-trial alternation test</u>                |                   |                               |                             |
| (animal weight [g] at day 6)                           | multivariate      | $F_{(7,71)}=0.07, p=0.797$    | treatment·sex·genotype | (% correct alternations)                            | univariate        | $F_{(2,44)}=3.84, p=0.029$    | treatment·sex·genotype      |
|                                                        | multivariate      | $F_{(1,71)}=0.77, p=0.384$    | treatment              |                                                     | univariate        | $F_{(2,44)}=6.63, p=0.003$    | treatment·genotype          |
|                                                        | multivariate      | $F_{(1,71)}=0.20, p=0.657$    | genotype               |                                                     | univariate        | $F_{(2,44)}=1.70, p=0.936$    | treatment                   |
|                                                        | multivariate      | $F_{(1,71)}=75.61, p<0.001$   | sex                    |                                                     | univariate        | $F_{(1,44)}=0.14, p=0.708$    | genotype                    |
| (animal weight [g] at day 14)                          | multivariate      | $F_{(7,71)}=0.12, p=0.730$    | treatment·sex·genotype |                                                     | univariate        | $F_{(1,44)}=6.63, p=0.199$    | sex                         |
|                                                        | multivariate      | $F_{(1,71)}=0.83, p=0.366$    | treatment              | - <i>split by treatment</i>                         | univariate        | $F_{(1,17)}=8.72, p=0.009$    | genotype                    |
|                                                        | multivariate      | $F_{(1,71)}=0.19, p=0.663$    | genotype               | saline                                              | univariate        | $F_{(1,18)}=4.89, p=0.040$    | genotype                    |
|                                                        | multivariate      | $F_{(1,71)}=93.34, p<0.001$   | sex                    | nicotine [24 mg·kg <sup>-1</sup> ·d <sup>-1</sup> ] |                   |                               |                             |
| <b>Two bottle choice preference</b>                    |                   |                               |                        | - <i>split by genotype</i>                          |                   |                               |                             |
| (nicotine cons. [ $\mu\text{g}\cdot\text{g}^{-1}$ BW]) | repeated measures | $F_{(1,42)}=0.77, p=0.439^*$  | sex·time·genotype      | WT                                                  | univariate        | $F_{(2,25)}=3.16, p=0.060$    | treatment                   |
|                                                        | repeated measures | $F_{(1,42)}=2.28, p=0.125^*$  | time·genotype          | -- <i>post hoc</i>                                  |                   |                               |                             |
|                                                        | repeated measures | $F_{(1,42)}=1.83, p=0.179^*$  | sex·time               | saline vs nicotine (24 mg)                          | Bonferoni         | $p=0.033$                     | treatment                   |
|                                                        | repeated measures | $F_{(1,42)}=37.53, p<0.001^*$ | time                   | TG                                                  | univariate        | $F_{(2,22)}=4.56, p=0.022$    | treatment                   |
| (nicotine preference [%])                              | repeated measures | $F_{(5,135)}=1.23, p=0.297^*$ | sex·time·genotype      | -- <i>post hoc</i>                                  |                   |                               |                             |
|                                                        | repeated measures | $F_{(5,135)}=0.48, p=0.795^*$ | time·genotype          | saline vs nicotine (24 mg)                          | Bonferoni         | $p=0.021$                     | treatment                   |
|                                                        | repeated measures | $F_{(5,135)}=2.01, p=0.081^*$ | sex·time               |                                                     |                   |                               |                             |
|                                                        | repeated measures | $F_{(5,135)}=0.83, p=0.539^*$ | time                   |                                                     |                   |                               |                             |

|                             | <u>analysis</u> | <u>significance</u>         | <u>factor</u>          |                                      | <u>analysis</u> | <u>significance</u>         | <u>factor</u>                 |
|-----------------------------|-----------------|-----------------------------|------------------------|--------------------------------------|-----------------|-----------------------------|-------------------------------|
| <b>PPI</b>                  |                 |                             |                        | (% inhibition at +15 dB)             | multivariate    | $F_{(7,71)}=5.133, p=0.027$ | treatment·sex·genotype        |
| <u>day 6</u>                |                 |                             |                        | - <i>split by sex</i>                |                 |                             |                               |
| (% inhibition at +5 dB)     | multivariate    | $F_{(7,71)}=6.41, p=0.014$  | treatment·sex·genotype | males                                | multivariate    | $F_{(3,36)}=0.46, p=0.503$  | treatment·genotype            |
| - <i>split by sex</i>       |                 |                             |                        | females                              | multivariate    | $F_{(3,35)}=6.55, p=0.015$  | treatment·genotype            |
| males                       | multivariate    | $F_{(3,36)}=1.96, p=0.170$  | treatment·genotype     | -- <i>split by genotype</i>          |                 |                             |                               |
| females                     | multivariate    | $F_{(3,35)}=7.11, p=0.012$  | treatment·genotype     | WT                                   | multivariate    | $F_{(1,18)}=1.90, p=0.185$  | treatment                     |
| -- <i>split by genotype</i> |                 |                             |                        | TG                                   | multivariate    | $F_{(1,17)}=4.86, p=0.041$  | treatment                     |
| WT                          | multivariate    | $F_{(1,18)}=1.99, p=0.176$  | treatment              |                                      |                 |                             |                               |
| TG                          | multivariate    | $F_{(1,17)}=5.54, p=0.031$  | treatment              | <b>Social recognition</b>            |                 |                             |                               |
| (% inhibition at +10 dB)    | multivariate    | $F_{(7,71)}=3.07, p=0.084$  | treatment·sex·genotype | <u>social interaction (1st exp.)</u> |                 |                             |                               |
| - <i>split by sex</i>       |                 |                             |                        | (interaction time [s])               | univariate      | $F_{(7,71)}=0.53, p=0.467$  | treatment·sex·genotype        |
| males                       | multivariate    | $F_{(3,36)}=0.81, p=0.814$  | treatment·genotype     |                                      | univariate      | $F_{(7,71)}=0.01, p=0.971$  | treatment·sex                 |
| females                     | multivariate    | $F_{(3,35)}=3.51, p=0.070$  | treatment·genotype     |                                      | univariate      | $F_{(7,71)}=0.04, p=0.845$  | sex·genotype                  |
| -- <i>split by genotype</i> |                 |                             |                        |                                      | univariate      | $F_{(1,71)}=1.43, p=0.236$  | treatment                     |
| WT                          | multivariate    | $F_{(1,18)}=5.54, p=0.379$  | treatment              |                                      | univariate      | $F_{(1,71)}=0.24, p=0.630$  | genotype                      |
| TG                          | multivariate    | $F_{(1,17)}=4.32, p=0.053$  | treatment              |                                      | univariate      | $F_{(1,71)}=5.60, p=0.021$  | sex                           |
| (% inhibition at +15 dB)    | multivariate    | $F_{(7,71)}=8.43, p=0.006$  | treatment·sex·genotype | <u>2h intertrial</u>                 |                 |                             |                               |
| - <i>split by sex</i>       |                 |                             |                        | (interaction time [s])               | univariate      | $F_{(15,60)}=0.32, p=0.575$ | treatment·object·genotype·sex |
| males                       | multivariate    | $F_{(3,36)}=0.81, p=0.373$  | treatment·genotype     |                                      | univariate      | $F_{(15,60)}=4.54, p=0.037$ | treatment·object·genotype     |
| females                     | multivariate    | $F_{(3,35)}=6.47, p=0.013$  | treatment·genotype     |                                      | univariate      | $F_{(1,60)}=0.19, p=0.669$  | treatment                     |
| -- <i>split by genotype</i> |                 |                             |                        |                                      | univariate      | $F_{(1,60)}=0.05, p=0.818$  | genotype                      |
| WT                          | multivariate    | $F_{(1,18)}=2.55, p=0.128$  | treatment              |                                      | univariate      | $F_{(1,60)}=6.60, p=0.013$  | object                        |
| TG                          | multivariate    | $F_{(1,17)}=9.63, p=0.006$  | treatment              |                                      | univariate      | $F_{(1,60)}=0.31, p=0.578$  | sex                           |
| <u>day 14</u>               |                 |                             |                        | - <i>split by genotype</i>           |                 |                             |                               |
| (% inhibition at +5 dB)     | multivariate    | $F_{(7,71)}=6.51, p=0.013$  | treatment·sex·genotype | WT                                   | univariate      | $F_{(3,36)}=6.53, p=0.015$  | object                        |
| - <i>split by sex</i>       |                 |                             |                        | -- <i>split by treatment</i>         |                 |                             |                               |
| males                       | multivariate    | $F_{(3,36)}=1.07, p=0.309$  | treatment·genotype     | saline                               | univariate      | $F_{(1,18)}=7.00, p=0.016$  | object                        |
| females                     | multivariate    | $F_{(3,35)}=7.04, p=0.012$  | treatment·genotype     | nicotine                             | univariate      | $F_{(1,18)}=0.99, p=0.340$  | object                        |
| -- <i>split by genotype</i> |                 |                             |                        | TG                                   | univariate      | $F_{(3,32)}=3.12, p=0.087$  | treatment·object              |
| WT                          | multivariate    | $F_{(1,18)}=2.78, p=0.113$  | treatment              | -- <i>split by treatment</i>         |                 |                             |                               |
| TG                          | multivariate    | $F_{(1,17)}=4.54, p=0.048$  | treatment              | saline                               | univariate      | $F_{(1,16)}=0.06, p=0.810$  | object                        |
| (% inhibition at +10 dB)    | multivariate    | $F_{(7,71)}=11.01, p=0.001$ | treatment·sex·genotype | nicotine                             | univariate      | $F_{(1,16)}=4.83, p=0.043$  | object                        |
| - <i>split by sex</i>       |                 |                             |                        | <u>4h intertrial</u>                 |                 |                             |                               |
| males                       | multivariate    | $F_{(3,36)}=0.27, p=0.604$  | treatment·genotype     | (interaction time [s])               | univariate      | $F_{(15,64)}=5.17, p=0.026$ | treatment·object·genotype·sex |
| females                     | multivariate    | $F_{(3,35)}=14.41, p=0.001$ | treatment·genotype     |                                      | univariate      | $F_{(15,64)}=5.61, p=0.021$ | treatment·object·genotype     |
| -- <i>split by genotype</i> |                 |                             |                        |                                      | univariate      | $F_{(1,64)}=0.13, p=0.720$  | treatment                     |
| WT                          | multivariate    | $F_{(1,18)}=6.03, p=0.024$  | treatment              |                                      | univariate      | $F_{(1,64)}=0.53, p=0.469$  | genotype                      |
| TG                          | multivariate    | $F_{(1,17)}=9.17, p=0.008$  | treatment              |                                      |                 |                             |                               |

|                              | <u>analysis</u> | <u>significance</u>          | <u>factor</u>    |                              | <u>analysis</u>   | <u>significance</u>            | <u>factor</u>               |
|------------------------------|-----------------|------------------------------|------------------|------------------------------|-------------------|--------------------------------|-----------------------------|
|                              |                 |                              |                  | <b>Morris watermaze</b>      |                   |                                |                             |
|                              |                 |                              |                  | <u>escape training</u>       |                   |                                |                             |
| - <i>split by genotype</i>   |                 |                              |                  | (distance moved [m])         | repeated measures | $F_{(4,146)}=0.69, p=0.617^*$  | sex·treatment·time·genotype |
| WT                           | univariate      | $F_{(1,64)}=0.01, p=0.996$   | object           |                              | repeated measures | $F_{(4,146)}=2.36, p=0.048^*$  | treatment·time·genotype     |
| -- <i>split by treatment</i> | univariate      | $F_{(1,64)}=3.80, p=0.056$   | sex              |                              | repeated measures | $F_{(4,146)}=5.72, p<0.001^*$  | treatment·time              |
| saline                       | univariate      | $F_{(3,36)}=4.17, p=0.049$   | treatment·object |                              | repeated measures | $F_{(4,146)}=1.67, p=0.153^*$  | genotype·time               |
| nicotine                     | univariate      | $F_{(1,18)}=2.67, p=0.120$   | object           |                              | repeated measures | $F_{(4,146)}=1.80, p=0.123^*$  | sex·time                    |
| TG                           | univariate      | $F_{(1,18)}=1.55, p=0.230$   | object           |                              | repeated measures | $F_{(4,146)}=66.22, p<0.001^*$ | time                        |
| -- <i>split by treatment</i> | univariate      | $F_{(3,36)}=4.28, p=0.046$   | treatment·object | - <i>split by treatment</i>  | repeated measures | $F_{(6,108)}=2.40, p=0.033$    | genotype·time               |
| saline                       | univariate      | $F_{(1,18)}=0.84, p=0.371$   | object           | saline                       | repeated measures | $F_{(3,66)}=0.85, p=0.492^*$   | genotype·time               |
| nicotine                     | univariate      | $F_{(1,18)}=4.77, p=0.042$   | object           | nicotine                     | repeated measures |                                |                             |
| <b>Novelty preference</b>    |                 |                              |                  | - <i>split by genotype</i>   | repeated measures | $F_{(6,108)}=5.22, p<0.001$    | treatment·time              |
| (interaction time [s])       | univariate      | $F_{(1,14)} = 4.48, p=0.053$ | sex·genotype     | WT                           | repeated measures | $F_{(3,67)}=2.57, p=0.048^*$   | treatment·time              |
|                              | univariate      | $F_{(1,14)} = 1.19, p=0.293$ | genotype         | TG                           | repeated measures |                                |                             |
|                              | univariate      | $F_{(1,14)} = 0.03, p=0.858$ | sex              | (velocity [cm/s])            | repeated measures | $F_{(4,145)}=0.34, p=0.874^*$  | sex·treatment·time·genotype |
| (nose contact time [s])      | univariate      | $F_{(1,14)} = 5.76, p=0.031$ | sex·genotype     |                              | repeated measures | $F_{(4,145)}=3.93, p=0.003^*$  | treatment·time              |
|                              | univariate      | $F_{(1,14)} = 0.13, p=0.720$ | genotype         |                              | repeated measures | $F_{(4,145)}=1.50, p=0.200^*$  | genotype·time               |
|                              | univariate      | $F_{(1,14)} = 0.08, p=0.781$ | sex              |                              | repeated measures | $F_{(4,145)}=2.23, p=0.061^*$  | sex·time                    |
|                              |                 |                              |                  |                              | repeated measures | $F_{(4,145)}=41.21, p<0.001^*$ | time                        |
| <b>Operant conditioning</b>  |                 |                              |                  | - <i>split by treatment</i>  | repeated measures | $F_{(6,108)}=1.02, p=0.418$    | genotype·time               |
| (day 10 reward [N])          | Kruskal Wallis  | $p<0.001$                    | 4 groups         | saline                       | repeated measures | $F_{(3,68)}=1.03, p=0.397$     | genotype·time               |
| - <i>post hoc</i>            |                 |                              |                  | nicotine                     | repeated measures |                                |                             |
| WT saline vs WT nicotine     | Dunnett-T3      | $p<0.001$                    | 2 groups         | <u>memory test</u>           |                   |                                |                             |
| TG saline vs WT nicotine     | Dunnett-T3      | $p=0.004$                    | 2 groups         | (distance moved [m])         | univariate        | $F_{(7,72)}=0.75, p=0.389$     | treatment·quadrant·genotype |
| TG nicotine vs WT nicotine   | Dunnett-T3      | $p=0.097$                    | 2 groups         |                              | univariate        | $F_{(7,72)}=2.87, p=0.095$     | quadrant·genotype           |
| TG nicotine vs WT saline     | Dunnett-T3      | $p=0.322$                    | 2 groups         |                              | univariate        | $F_{(1,72)}=0.01, p=0.929$     | treatment                   |
| TG nicotine vs TG saline     | Dunnett-T3      | $p=0.761$                    | 2 groups         |                              | univariate        | $F_{(1,72)}=6.11, p=0.016$     | genotype                    |
| (day 10 total nosepokes [N]) | Kruskal Wallis  | $p=0.001$                    | 4 groups         |                              | univariate        | $F_{(1,72)}=15.42, p<0.001$    | quadrant                    |
| - <i>post hoc</i>            |                 |                              |                  | - <i>split by genotype</i>   |                   |                                |                             |
| WT saline vs WT nicotine     | Dunnett-T3      | $p=0.001$                    | 2 groups         | WT                           | univariate        | $F_{(1,36)}=24.67, p<0.001$    | quadrant                    |
| TG saline vs WT nicotine     | Dunnett-T3      | $p=0.012$                    | 2 groups         | -- <i>split by treatment</i> |                   |                                |                             |
| TG nicotine vs WT nicotine   | Dunnett-T3      | $p=0.156$                    | 2 groups         | saline                       | univariate        | $F_{(1,18)}=0.48, p=0.002$     | quadrant                    |
| TG nicotine vs WT saline     | Dunnett-T3      | $p=0.550$                    | 2 groups         | nicotine                     | univariate        | $F_{(1,18)}=0.92, p=0.003$     | quadrant                    |
| TG nicotine vs TG saline     | Dunnett-T3      | $p=0.746$                    | 2 groups         |                              |                   |                                |                             |
| (day 1 total nosepokes [N])  | Kruskal Wallis  | $p=0.190$                    | 4 groups         |                              |                   |                                |                             |

|                                               | <u>analysis</u> | <u>significance</u>                    | <u>factor</u>             |                                    | <u>analysis</u> | <u>significance</u>                    | <u>factor</u>             |
|-----------------------------------------------|-----------------|----------------------------------------|---------------------------|------------------------------------|-----------------|----------------------------------------|---------------------------|
| TG                                            |                 |                                        |                           | <u>α7 binding</u>                  |                 |                                        |                           |
| saline                                        | univariate      | F <sub>(1,18)</sub> =1.32, p=0.048     | quadrant                  | ( <sup>125</sup> I) α-bungarotoxin | multivariate    | F <sub>(17,478)</sub> =0.64, p=0.861   | treatment-genotype-region |
| nicotine                                      | univariate      | F <sub>(1,18)</sub> =0.06, p=0.924     | quadrant                  | [fmol·mg tissue equivalent-1])     | multivariate    | F <sub>(1,478)</sub> =0.53, p=0.466    | treatment-genotype        |
| - <i>split by quadrant</i>                    |                 |                                        |                           |                                    | multivariate    | F <sub>(17,478)</sub> =1.18, p=0.279   | genotype-region           |
| error                                         | univariate      | F <sub>(1,36)</sub> =0.39, p=0.538     | genotype                  |                                    | multivariate    | F <sub>(17,478)</sub> =0.46, p=0.970   | treatment-region          |
| target                                        | univariate      | F <sub>(1,36)</sub> =7.14, p=0.011     | genotype                  |                                    | multivariate    | F <sub>(17,478)</sub> =112.08, p<0.001 | region                    |
| -- <i>split by treatment</i>                  |                 |                                        |                           |                                    | multivariate    | F <sub>(1,478)</sub> =33.30, p<0.001   | genotype                  |
| saline                                        | univariate      | F <sub>(1,19)</sub> =1.98, p=0.177     | genotype                  |                                    | multivariate    | F <sub>(1,478)</sub> =0.47, p=0.492    | treatment                 |
| nicotine                                      | univariate      | F <sub>(1,19)</sub> =5.66, p=0.029     | genotype                  | - <i>split by region</i>           |                 |                                        |                           |
| <b>Autoradiography</b>                        |                 |                                        |                           | cingulate cortex                   | multivariate    | F <sub>(1,28)</sub> =5.66, p=0.024     | genotype                  |
| <u>α4β2* binding</u>                          |                 |                                        |                           |                                    | multivariate    | F <sub>(1,28)</sub> =4.42, p=0.044     | treatment-genotype        |
| (cytisine-sens.[ <sup>125</sup> I]epibatidine | multivariate    | F <sub>(27,719)</sub> =0.74, p=0.824   | treatment-genotype-region | -- <i>post hoc</i>                 |                 |                                        |                           |
| [fmol·mg tissue equivalent-1])                | multivariate    | F <sub>(1,719)</sub> =0.03, p=0.853    | treatment-genotype        | TG saline vs WT saline             | Duncan's        | p=0.006                                | 2 groups                  |
|                                               | multivariate    | F <sub>(27,719)</sub> =0.37, p=0.999   | genotype-region           | TG nicotine vs WT nicotine         | Duncan's        | p=0.847                                | 2 groups                  |
|                                               | multivariate    | F <sub>(31,828)</sub> =1.47, p=0.030   | treatment-region          | basomedial amygdala                | multivariate    | F <sub>(1,22)</sub> =6.87, p=0.015     | genotype-treatment        |
|                                               | multivariate    | F <sub>(27,719)</sub> =198.14, p<0.001 | region                    | -- <i>post hoc</i>                 |                 |                                        |                           |
|                                               | multivariate    | F <sub>(1,719)</sub> =75.51, p<0.001   | treatment                 | TG saline vs WT saline             | Duncan's        | p=0.025                                | 2 groups                  |
|                                               | multivariate    | F <sub>(1,719)</sub> =1.40, p=0.237    | genotype                  | TG nicotine vs WT nicotine         | Duncan's        | p=0.276                                | 2 groups                  |
| - <i>split by region</i>                      |                 |                                        |                           | ventral medial                     |                 |                                        |                           |
| caudate putamen                               | multivariate    | F <sub>(1,26)</sub> =6.34, p=0.018     | treatment                 | hypothalamus                       | multivariate    | F <sub>(1,25)</sub> =8.34, p=0.007     | treatment-genotype        |
| preoptic area                                 | multivariate    | F <sub>(1,25)</sub> =4.50, p=0.043     | treatment                 | -- <i>post hoc</i>                 |                 |                                        |                           |
| lateral dorsal thalamic nuclei                | multivariate    | F <sub>(1,26)</sub> =6.14, p=0.020     | treatment                 | TG nicotine vs WT nicotine         | Duncan's        | p=0.026                                | 2 groups                  |
| olfactory tubercles                           | multivariate    | F <sub>(1,25)</sub> =9.68, p=0.005     | treatment                 | TG saline vs WT saline             | Duncan's        | p=0.141                                | 2 groups                  |
| retrosplenial cortex                          | multivariate    | F <sub>(1,27)</sub> =12.42, p=0.002    | treatment                 | dentate gyrus                      | multivariate    | F <sub>(1,28)</sub> =5.08, p=0.032     | treatment-genotype        |
| hypothalamus                                  | multivariate    | F <sub>(1,24)</sub> =16.00, p<0.001    | treatment                 | -- <i>post hoc</i>                 |                 |                                        |                           |
| medial septum                                 | multivariate    | F <sub>(1,23)</sub> =36.28, p<0.001    | treatment                 | TG nicotine vs WT nicotine         | Duncan's        | p=0.049                                | 2 groups                  |
| vertical diagonal band                        | multivariate    | F <sub>(1,22)</sub> =37.49, p<0.001    | treatment                 | TG saline vs WT saline             | Duncan's        | p=0.268                                | 2 groups                  |
| hippocampus                                   | multivariate    | F <sub>(1,27)</sub> =13.77, p<0.001    | treatment                 | dorsal endopiriform                | multivariate    | F <sub>(1,30)</sub> =5.73, p=0.023     | genotype                  |
| frontal association                           | multivariate    | F <sub>(1,28)</sub> =39.31, p<0.001    | treatment                 | ventral medial geniculate          | multivariate    | F <sub>(1,24)</sub> =4.46, p=0.045     | genotype                  |
| prelimbic cortex                              | multivariate    | F <sub>(1,28)</sub> =59.27, p<0.001    | treatment                 | CA1                                | multivariate    | F <sub>(1,25)</sub> =4.30, p=0.048     | genotype                  |
| primary motor cortex                          | multivariate    | F <sub>(1,28)</sub> =66.40, p<0.001    | treatment                 |                                    |                 |                                        |                           |
| secondary motor cortex                        | multivariate    | F <sub>(1,28)</sub> =71.04, p<0.001    | treatment                 |                                    |                 |                                        |                           |
| cingulate cortex                              | multivariate    | F <sub>(1,28)</sub> =21.73, p<0.001    | treatment                 |                                    |                 |                                        |                           |
| somatosensory cortex                          | multivariate    | F <sub>(1,28)</sub> =47.26, p<0.001    | treatment                 |                                    |                 |                                        |                           |
| piriform cortex                               | multivariate    | F <sub>(1,28)</sub> =29.58, p<0.001    | treatment                 |                                    |                 |                                        |                           |
| visual cortex                                 | multivariate    | F <sub>(1,28)</sub> =25.00, p<0.001    | treatment                 |                                    |                 |                                        |                           |
| auditory cortex                               | multivariate    | F <sub>(1,21)</sub> =55.50, p<0.001    | treatment                 |                                    |                 |                                        |                           |
| interpeduncular nucleus                       | multivariate    | F <sub>(1,27)</sub> =5.20, p=0.031     | genotype                  |                                    |                 |                                        |                           |

\* Greenhouse-Geisser corrected, as data are not spheric
