# Supplementary material
Source: PubMed Central journal article supplement (PMC3966754)
Supplement: bph0171-1758-sd5.pdf [file bph0171-1758-sd5.pdf]

| (fmol·mg <sup>-1</sup> ) |           | WT         |            | TG         |            |
|--------------------------|-----------|------------|------------|------------|------------|
| Receptor                 | Area      | Saline     | Nicotine   | Saline     | Nicotine   |
| $\alpha 7$               | BLA       | 25.4 ± 2.0 | 25.8 ± 1.1 | 32.1 ± 4.8 | 32.8 ± 3.5 |
|                          | CA2/3     | 45.8 ± 2.5 | 42.3 ± 3.0 | 44.3 ± 3.3 | 45.1 ± 2.7 |
|                          | CPu       | 32.4 ± 4.8 | 30.9 ± 1.5 | 35.0 ± 2.6 | 32.5 ± 2.9 |
|                          | DM        | 32.4 ± 1.0 | 27.0 ± 1.7 | 29.4 ± 3.1 | 33.1 ± 2.0 |
|                          | InG       | 25.2 ± 2.0 | 26.4 ± 1.5 | 26.6 ± 1.5 | 29.3 ± 1.6 |
|                          | LH        | 34.7 ± 3.0 | 28.8 ± 3.5 | 32.5 ± 3.1 | 37.0 ± 3.9 |
|                          | M1        | 37.2 ± 5.0 | 34.9 ± 3.0 | 38.5 ± 3.5 | 37.1 ± 3.1 |
|                          | SuG       | 53.8 ± 2.3 | 52.9 ± 2.7 | 55.9 ± 2.6 | 53.1 ± 5.4 |
|                          | ZI        | 41.2 ± 3.0 | 38.7 ± 3.3 | 47.0 ± 5.9 | 42.9 ± 2.6 |
| $\alpha 4\beta 2^*$      | AcbC      | 3.5 ± 0.4  | 3.8 ± 0.2  | 3.4 ± 0.3  | 3.9 ± 0.2  |
|                          | AcbSh     | 3.6 ± 0.4  | 3.9 ± 0.2  | 3.1 ± 0.5  | 3.8 ± 0.3  |
|                          | AV        | 10.5 ± 0.6 | 11.7 ± 0.5 | 10.2 ± 1.6 | 11.6 ± 0.5 |
|                          | CPu       | 3.5 ± 0.3  | 4.2 ± 0.2  | 3.8 ± 0.2  | 4.4 ± 0.3  |
|                          | DLG       | 15.9 ± 1.4 | 14.2 ± 0.9 | 16.3 ± 1.0 | 13.9 ± 1.8 |
|                          | fr        | 20.4 ± 1.9 | 24.0 ± 0.4 | 22.5 ± 0.6 | 23.4 ± 0.9 |
|                          | Hip       | 1.4 ± 0.2  | 1.9 ± 0.2  | 1.1 ± 0.1  | 1.9 ± 0.2  |
|                          | InG       | 8.6 ± 0.6  | 9.5 ± 0.4  | 9.2 ± 0.4  | 10.3 ± 0.9 |
|                          | MHb       | 23.6 ± 0.4 | 24.2 ± 0.8 | 23.9 ± 0.8 | 24.1 ± 0.5 |
|                          | S         | 5.7 ± 1.1  | 6.0 ± 0.4  | 5.1 ± 0.3  | 6.1 ± 0.3  |
|                          | SN        | 7.6 ± 1.5  | 7.9 ± 0.2  | 6.8 ± 0.5  | 8.3 ± 0.9  |
|                          | SuG       | 17.5 ± 1.6 | 16.5 ± 1.2 | 16.7 ± 1.1 | 19.3 ± 1.2 |
|                          | VLG       | 13.9 ± 1.6 | 15.1 ± 0.7 | 16.2 ± 0.8 | 15.4 ± 0.9 |
| VTA                      | 6.9 ± 1.7 | 7.9 ± 0.5  | 6.5 ± 0.6  | 7.7 ± 0.6  |            |
